# Supplementary material for: Association of uric acid with kidney function and albuminuria: the Uric Acid Right for heArt Health (URRAH) Project
Source: PubMed Central journal article supplement (PMC8803667; doi:10.1007/s40620-021-00985-4), 2021-03-23
Supplement: 40620_2021_985_MOESM1_ESM.pdf [file 40620_2021_985_MOESM1_ESM.pdf]

**Supplemental Table 1. Clinical Characteristics on the basis of presence/absence of hyperuricemia accordingly with URRAH cut-offs for cardiovascular (5.6 mg/dl) and all-cause mortality (4.7 mg/dl) or allopurinol use.**

|                                                   | SUA <5.6<br>mg/dl | SUA ≥5.6<br>mg/dl | p       | SUA <4.7<br>mg/dl | SUA ≥4.7<br>mg/dl | p       |
|---------------------------------------------------|-------------------|-------------------|---------|-------------------|-------------------|---------|
| <b>N</b>                                          | 9,726             | 9,821             |         | 6,904             | 15,462            |         |
| <b>Age, years</b>                                 | 60 ±15            | 61 ±15            | 0.0001  | 59 ±15            | 60 ±15            | 0.0287  |
| <b>Males, %</b>                                   | 41.9              | 60.2              | <0.0001 | 36.3              | 57.9              | <0.0001 |
| <b>Smokers, %</b>                                 | 20.7              | 23.4              | <0.0001 | 20.4              | 23.6              | <0.0001 |
| <b>Alcohol consumption, %</b>                     | 64.5              | 65.5              | 0.1801  | 62.4              | 64.6              | 0.005   |
| <b>Body mass index, kg/m<sup>2</sup></b>          | 26.4 ±4.4         | 28.0 ±4.2         | <0.0001 | 26.0 ±4.4         | 27.5 ±4.2         | <0.0001 |
| <b>Family history for hypertension, %</b>         | 53.3              | 52.5              | 0.3236  | 53                | 52.2              | 0.3163  |
| <b>Diabetes, %</b>                                | 12.5              | 15.8              | <0.0001 | 12.1              | 14.1              | <0.0001 |
| <b>Hypertension, %</b>                            | 59.3              | 62.7              | <0.0001 | 57.4              | 62.5              | <0.0001 |
| <b>Systolic BP, mmHg</b>                          | 141.4 ±23.4       | 145.6 ±22.2       | <0.0001 | 139.9 ±24.0       | 144.8 ±22.2       | <0.0001 |
| <b>Diastolic BP, mmHg,</b>                        | 82.5 ±11.7        | 85.5 ±12.8        | <0.0001 | 81.8 ±11.6        | 85.3 ±12.5        | <0.0001 |
| <b>Heart rate, bpm</b>                            | 72 ±12            | 71 ±12            | <0.0001 | 73 ±12            | 71 ±12            | <0.0001 |
| <b>Creatinine, mg/dl</b>                          | 0.89 ±0.34        | 1.09 ±0.45        | <0.0001 | 0.87 ±0.35        | 1.03 ±0.41        | <0.0001 |
| <b>eGFR, ml/min per 1.73m<sup>2</sup></b>         | 83.6 ±20.0        | 72.5 ±21.6        | <0.0001 | 85.5 ±20.0        | 76.1 ±21.0        | <0.0001 |
| <b>eGFR&lt;60 ml/min per 1.73m<sup>2</sup>, %</b> | 11                | 27.7              | <0.0001 | 9.2               | 21.9              | <0.0001 |
| <b>Normo-micro-macroalbuminuria, %</b>            | 77.8-17.2-4.9     | 74.2-19.7-6.1     | 0.0062  | 78.7-16.8-4.6     | 78.5-16.5-5.0     | 0.7812  |
| <b>Serum uric acid, mg/dl</b>                     | 4.28 ±0.87        | 6.66 ±1.04        | <0.0001 | 3.79 ±0.67        | 6.03 ±1.09        | <0.0001 |
| <b>Gout, %</b>                                    | 0.1               | 4.4               | <0.0001 | 0.1               | 2.8               | <0.0001 |
| <b>Allopurinol use, %</b>                         | 0                 | 11.3              | <0.0001 | 0                 | 6.5               | <0.0001 |
| <b>Hemoglobin, g/dl</b>                           | 14.0 ±1.4         | 14.5 ±1.6         | <0.0001 | 13.9 ±1.3         | 14.5 ±1.5         | <0.0001 |
| <b>Glucose, mg/dl</b>                             | 99 ±28            | 102 ±24           | <0.0001 | 98 ±29            | 101 ±24           | <0.0001 |
| <b>Cholesterol, mg/dl</b>                         | 207 ±40           | 209 ±41           | 0.0043  | 207 ±40           | 210 ±41           | 0.0004  |
| <b>HDL-cholesterol, mg/dl</b>                     | 56 ±19            | 51 ±19            | <0.0001 | 57 ±19            | 52 ±18            | <0.0001 |
| <b>LDL-cholesterol, mg/dl</b>                     | 129 ±38           | 128 ±40           | 0.6699  | 129 ±37           | 130 ±39           | 0.321   |
| <b>Triglycerides, mg/dl</b>                       | 117 ±67           | 152 ±91           | <0.0001 | 112 ±65           | 141 ±84           | <0.0001 |
| <b>ACE inhibitors,%</b>                           | 12.5              | 19                | <0.0001 | 11.1              | 18                | <0.0001 |
| <b>ARB, %</b>                                     | 10.2              | 18.4              | <0.0001 | 8.4               | 16.3              | <0.0001 |
| <b>Calcium channel blockers,%</b>                 | 7.1               | 12.6              | <0.0001 | 6.3               | 11.5              | <0.0001 |
| <b>Beta blockers, %</b>                           | 13.7              | 26                | <0.0001 | 12.1              | 22.3              | <0.0001 |
| <b>Diuretics, %</b>                               | 6.3               | 10.7              | <0.0001 | 5.6               | 9.4               | <0.0001 |

Data presented as mean ± standard deviation or percentage.

Abbreviations: eGFR, estimated glomerular filtration rate; BP, blood pressure; ACM, all-cause mortality; CVM, cardiovascular mortality; SUA, serum uric acid; HDL, high-density lipoprotein; LDL, low-density lipoprotein; ACE, angiotensin converting enzyme; ARB, angiotensin II receptor blockers.

**Supplemental Table 2. Correlates of serum uric acid levels at linear regression analyses**

|                                                            | Univariate  |           |       |         | Multivariate |             |         |         |
|------------------------------------------------------------|-------------|-----------|-------|---------|--------------|-------------|---------|---------|
|                                                            | Regr. Coef. | CI 95%    | R     | p       | Regr. Coef.  | CI 95%      | t-value | p       |
| <b>Gender, male</b>                                        | 0.38        | 0.35-0.42 | 0.133 | <0.0001 | 0.67         | 0.64-0.71   | 38.75   | <0.0001 |
| <b>Age, years</b>                                          | 0.01        | 0.01-0.01 | 0.135 | <0.0001 | -0.01        | -0.01 -0.01 | -16.45  | <0.0001 |
| <b>Body mass index, kg/m<sup>2</sup></b>                   | 0.08        | 0.07-0.08 | 0.237 | <0.0001 | 0.06         | 0.05-0.06   | 29.12   | <0.0001 |
| <b>Triglycerides, mg/dl</b>                                | 0.01        | 0.01-0.01 | 0.257 | <0.0001 | 0.00         | 0.00-0.00   | 28.54   | <0.0001 |
| <b>eGFR, each 10 ml/min per 1.73m<sup>2</sup> increase</b> | -0.80       | 0.80-0.81 | 0.318 | <0.0001 | -0.76        | 0.74-0.76   | -56.46  | <0.0001 |

Abbreviations: Regr. Coef., regression coefficient; R, Std coefficient; CI, confidence intervals; eGFR, estimated glomerular filtration rate.

**Supplemental Table 3. Correlates of hyperuricemia defined as SUA>7 mg/dl or allopurinol use**

|                                                            | Univariate  |       |             |         | Model 1     |       |             |         | Model 2     |       |             |         |
|------------------------------------------------------------|-------------|-------|-------------|---------|-------------|-------|-------------|---------|-------------|-------|-------------|---------|
|                                                            | Regr. Coef. | OR    | CI 95%      | p       | Regr. Coef. | OR    | CI 95%      | p       | Regr. Coef. | OR    | CI 95%      | p       |
| <b>eGFR ≥90 ml/min per 1.73m<sup>2</sup></b>               |             | ref   |             |         |             | ref   |             |         |             | Ref   |             |         |
| <b>eGFR 89-60 ml/min per 1.73m<sup>2</sup></b>             | 0.813       | 2.25  | 2.03-2.51   | <0.0001 | 0.954       | 2.59  | 2.31-2.91   | <0.0001 | 0.939       | 2.56  | 2.24-2.92   | <0.0001 |
| <b>eGFR 59-45 ml/min per 1.73m<sup>2</sup></b>             | 1.695       | 5.45  | 4.80-6.18   | <0.0001 | 2.113       | 8.28  | 7.14-9.59   | <0.0001 | 2.106       | 8.22  | 6.95-9.71   | <0.0001 |
| <b>eGFR 44-30 ml/min per 1.73m<sup>2</sup></b>             | 2.547       | 12.77 | 10.90-14.96 | <0.0001 | 2.924       | 18.62 | 15.53-22.32 | <0.0001 | 2.949       | 19.08 | 15.42-23.61 | <0.0001 |
| <b>eGFR&lt;30 ml/min per 1.73m<sup>2</sup></b>             | 3.045       | 21.01 | 16.99-25.99 | <0.0001 | 3.288       | 26.72 | 21.24-33.62 | <0.0001 | 3.407       | 30.17 | 22.76-39.99 | <0.0001 |
| <b>Gender, male</b>                                        | 0.447       | 1.56  | 1.45-1.69   | <0.0001 | 0.913       | 2.49  | 2.90-2.71   | <0.0001 | 0.956       | 2.60  | 2.36-2.87   | <0.0001 |
| <b>Age &lt;45 years</b>                                    |             | ref   |             |         |             | ref   |             |         |             | ref   |             |         |
| <b>Age 45-65 years</b>                                     | 0.518       | 1.68  | 1.48-1.90   | <0.0001 | 0.100       | 1.10  | 0.97-1.26   | 0.1421  | -0.066      | 0.94  | 0.80-1.09   | 0.3846  |
| <b>Age &gt;65 years</b>                                    | 1.043       | 2.84  | 2.51-3.20   | <0.0001 | 0.015       | 1.02  | 0.88-1.70   | 0.8301  | -0.183      | 0.83  | 0.71-0.98   | 0.0256  |
| <b>Hypertension, presence of</b>                           | 0.519       | 1.68  | 1.54-1.83   | <0.0001 |             |       |             |         | 0.494       | 1.64  | 1.48-1.82   | <0.0001 |
| <b>Diabetes, presence of</b>                               | 0.723       | 2.06  | 1.87-2.27   | <0.0001 |             |       |             |         | 0.213       | 1.24  | 1.10-1.39   | 0.0159  |
| <b>Body mass index &gt;30 kg/m<sup>2</sup></b>             | 0.708       | 2.03  | 1.86-2.21   | <0.0001 |             |       |             |         | 0.605       | 1.83  | 1.66-2.02   | <0.0001 |
| <b>Triglycerides &gt;200 mg/dl</b>                         | 1.075       | 2.93  | 2.67-3.22   | <0.0001 |             |       |             |         | 0.918       | 2.50  | 2.25-2.79   | <0.0001 |
| <b>eGFR, each 10 ml/min per 1.73m<sup>2</sup> increase</b> | -0.038      | 0.68  | 0.66-0.69   | <0.0001 |             |       |             |         |             |       |             |         |
| <b>eGFR &lt;60 ml/min per 1.73m<sup>2</sup></b>            | 1.520       | 4.57  | 4.22-4.96   | <0.0001 |             |       |             |         |             |       |             |         |

Abbreviations: Regr. Coef., logistic regression coefficient; OR, odds ratio; CI, confidence intervals; eGFR, estimated glomerular filtration rate.

Supplemental Table 4. Correlates of gout

|                                                      | Univariate  |       |             |         | Model 1     |       |             |         | Model 2     |       |             |         |
|------------------------------------------------------|-------------|-------|-------------|---------|-------------|-------|-------------|---------|-------------|-------|-------------|---------|
|                                                      | Regr. Coef. | OR    | CI 95%      | P       | Regr. Coef. | OR    | CI 95%      | p       | Regr. Coef. | OR    | CI 95%      | p       |
| eGFR ≥90 ml/min per 1.73m <sup>2</sup>               |             | ref   |             |         |             | ref   |             |         |             | ref   |             |         |
| eGFR 89-60 ml/min per 1.73m <sup>2</sup>             | 0.737       | 2.09  | 1.46-3.00   | <0.0001 | 0.662       | 1.93  | 1.30-2.88   | 0.0010  | 0.631       | 1.88  | 1.22-2.90   | <0.0001 |
| eGFR 59-45 ml/min per 1.73m <sup>2</sup>             | 1.134       | 3.11  | 2.00-4.84   | <0.0001 | 1.258       | 3.52  | 2.14-5.79   | <0.0001 | 1.166       | 3.21  | 1.85-5.57   | 0.0043  |
| eGFR 44-30 ml/min per 1.73m <sup>2</sup>             | 1.384       | 3.99  | 2.14-7.43   | <0.0001 | 1.499       | 4.48  | 2.28-8.78   | <0.0001 | 1.335       | 3.80  | 1.78-8.11   | 0.0006  |
| eGFR<30 ml/min per 1.73m <sup>2</sup>                | 3.229       | 30.84 | 16.96-56.08 | <0.0001 | 3.493       | 32.89 | 17.07-63.37 | <0.0001 | 3.531       | 34.16 | 16.40-71.17 | <0.0001 |
| Gender, male                                         | 1.026       | 2.79  | 2.12-3.67   | <0.0001 | 1.306       | 3.69  | 2.77-4.91   | <0.0001 | 1.428       | 4.17  | 3.02-5.76   | <0.0001 |
| Age <45 years                                        |             | ref   |             |         |             | ref   |             |         |             | ref   |             |         |
| Age 45-65 years                                      | 0.558       | 1.75  | 0.96-3.18   | 0.0676  | 0.328       | 1.39  | 0.75-2.57   | 0.2954  | -0.069      | 0.93  | 0.49-1.79   | 0.8361  |
| Age >65 years                                        | 1.297       | 3.66  | 2.08-6.44   | <0.0001 | 0.746       | 2.11  | 1.14-3.89   | <0.0001 | 0.181       | 1.20  | 0.61-2.34   | 0.5969  |
| Hypertension, presence of                            | 1.330       | 3.81  | 2.88-5.04   | <0.0001 |             |       |             |         | 0.616       | 1.85  | 1.26-2.72   | <0.0017 |
| Diabetes, presence of                                | 0.102       | 1.11  | 1.08-1.13   | <0.0001 |             |       |             |         | 0.896       | 2.45  | 1.74-3.36   | <0.0001 |
| Body mass index >30 kg/m <sup>2</sup>                | 0.903       | 2.47  | 1.90-3.21   | <0.0001 |             |       |             |         | 0.722       | 2.06  | 1.53-2.78   | <0.0001 |
| Triglycerides >200 mg/dl                             | 0.705       | 2.02  | 1.47-2.77   | <0.0001 |             |       |             |         | 0.462       | 1.59  | 1.12-2.24   | 0.0087  |
| eGFR, each 10 ml/min per 1.73m <sup>2</sup> increase | 0.921       | 2.51  | 1.91-3.30   | <0.0001 |             |       |             |         |             |       |             |         |

Abbreviations: Regr. Coef., logistic regression coefficient; OR, odds ratio; CI, confidence intervals; eGFR, estimated glomerular filtration rate.

Supplemental Table 5. Clinical characteristics on the basis of albumin excretion.

|                                                                              | All         | Normoalbuminuria | Microalbuminuria | Macroalbuminuria | p       |
|------------------------------------------------------------------------------|-------------|------------------|------------------|------------------|---------|
| <b>N</b>                                                                     | 7484        | 6067             | 1109             | 308              |         |
| <b>Age, years</b>                                                            | 59 ±15      | 58 ±14           | 66 ±14           | 68 ±14           | <0.0001 |
| <b>Males, %</b>                                                              | 54.9        | 53.5             | 58.2             | 70.1             | <0.0001 |
| <b>Smokers, %</b>                                                            | 22.0        | 21.9             | 22.8             | 23.1             | 0.8189  |
| <b>Alcohol consumption, %</b>                                                | 44.6        | 43.8             | 51.4             | 53.8             | 0.0050  |
| <b>Body mass index, kg/m<sup>2</sup></b>                                     | 26.6 ±4.3   | 26.4 ±4.1        | 27.6 ±4.5        | 28.0 ±5.6        | <0.0001 |
| <b>Family history for hypertension, %</b>                                    | 62.7        | 61.9             | 68.8             | 65.0             | <0.0001 |
| <b>Diabetes, %</b>                                                           | 10.9        | 6.5              | 27.5             | 33.7             | <0.0001 |
| <b>Hypertension, %</b>                                                       | 62.3        | 65.6             | 61.7             | 48.1             | <0.0001 |
| <b>Systolic BP, mmHg</b>                                                     | 144.7 ±20.4 | 145.2 ±20.3      | 142.6 ±20.8      | 143.5 ±19.9      | <0.0001 |
| <b>Diastolic BP, mmHg,</b>                                                   | 84.4 ±13.3  | 85.2 ±13.0       | 81.2 ±13.7       | 78.2 ±12.3       | <0.0001 |
| <b>Heart rate, bpm</b>                                                       | 69 ±11      | 69 ±11           | 71 ±12           | 75 ±13           | <0.0001 |
| <b>Creatinine, mg/dl</b>                                                     | 1.0 ±0.5    | 0.9 ±0.2         | 1.2 ±0.5         | 2.2 ±1.5         | <0.0001 |
| <b>eGFR, ml/min per 1.73m<sup>2</sup></b>                                    | 78.8 ±23.2  | 82.6 ±19.8       | 68.2 ±27.1       | 43.5 ±28.6       | <0.0001 |
| <b>eGFR&lt;60 ml/min per 1.73m<sup>2</sup></b>                               | 20.1        | 13.8             | 39.7             | 74.4             | <0.0001 |
| <b>Uric acid, mg/dl</b>                                                      | 5.23 ±1.44  | 5.18 ±1.40       | 5.45 ±1.56       | 5.41 ±1.69       | <0.0001 |
| <b>Allopurinol use or hyperuricemia (URRAH cut-off for CVM=5.6 mg/dl), %</b> | 51.7        | 50.5             | 54.9             | 57.1             | 0.0062  |
| <b>Allopurinol use or hyperuricemia (URRAH cut-off for ACM=4.7 mg/dl), %</b> | 73.9        | 73.8             | 73.6             | 75.6             | 0.7812  |
| <b>Allopurinol use, %</b>                                                    | 7.4         | 2.1              | 16.5             | 35.1             | <0.0001 |
| <b>Gout, %</b>                                                               | 0.9         | 0.7              | 1.7              | 6.3              | <0.0001 |
| <b>Hemoglobin, g/dl</b>                                                      | 14.0 ±1.5   | 14.3 ±1.3        | 13.6 ±1.6        | 12.9 ±1.9        | <0.0001 |
| <b>Glucose, mg/dl</b>                                                        | 96 ±21      | 95 ±18           | 104 ±30          | 108 ±39          | <0.0001 |
| <b>Cholesterol, mg/dl</b>                                                    | 201 ±40     | 205 ±38          | 187 ±42          | 172 ±45          | <0.0001 |
| <b>HDL-cholesterol, mg/dl</b>                                                | 53 ±15      | 53 ±15           | 51 ±15           | 48 ±14           | <0.0001 |
| <b>LDL-cholesterol, mg/dl</b>                                                | 126 ±37     | 129 ±35          | 112 ±38          | 95 ±40           | <0.0001 |
| <b>Triglycerides, mg/dl</b>                                                  | 120 ±70     | 117 ±67          | 129 ±85          | 156 ±85          | <0.0001 |
| <b>ACE inhibitors,%</b>                                                      | 19.5        | 17.0             | 28.0             | 31.1             | <0.0001 |
| <b>ARB, %</b>                                                                | 15.2        | 12.2             | 25.8             | 25.2             | <0.0001 |
| <b>Calcium channel blockers,%</b>                                            | 10.9        | 8.7              | 19.7             | 21.1             | <0.0001 |
| <b>Beta blockers, %</b>                                                      | 10.9        | 10.5             | 14.1             | 5.4              | <0.0001 |
| <b>Diuretics, %</b>                                                          | 23.3        | 16.4             | 43.4             | 60.5             | <0.0001 |
| <b>Statins, %</b>                                                            | 15.8        | 12.4             | 28.3             | 30.2             | <0.0001 |

Data presented as mean ± standard deviation or percentage.

Abbreviations: eGFR, estimated glomerular filtration rate; BP, blood pressure; ACM, all-cause mortality; CVM, cardiovascular mortality; SUA, serum uric acid; HDL, high-density lipoprotein; LDL, low-density lipoprotein; ACE, angiotensin converting enzyme; ARB, angiotensin II receptor blockers.



**Supplemental Table 7. Correlates of hyperuricemia defined on the basis of URRAH cutoff predictive for all-cause mortality in patients with available albuminuria (N=7484)**

|                                                      | Univariate  |      |           |         | Model 1     |       |             |         | Model 2     |       |             |         |
|------------------------------------------------------|-------------|------|-----------|---------|-------------|-------|-------------|---------|-------------|-------|-------------|---------|
|                                                      | Regr. Coef. | OR   | CI 95%    | p       | Regr. Coef. | OR    | CI 95%      | p       | Regr. Coef. | OR    | CI 95%      | p       |
| eGFR ≥90 ml/min per 1.73m <sup>2</sup>               |             | ref  |           |         |             | ref   |             |         |             | ref   |             |         |
| eGFR 89-60 ml/min per 1.73m <sup>2</sup>             | 0.730       | 2.07 | 1.83-2.35 | <0.0001 | 1.281       | 3.60  | 3.03-4.29   | <0.0001 | 1.283       | 3.61  | 3.03-4.30   | <0.0001 |
| eGFR 59-45 ml/min per 1.73m <sup>2</sup>             | 1.649       | 5.20 | 4.09-6.61 | <0.0001 | 2.953       | 19.17 | 13.84-26.54 | <0.0001 | 2.979       | 19.67 | 14.20-27.26 | <0.0001 |
| eGFR 44-30 ml/min per 1.73m <sup>2</sup>             | 1.697       | 5.46 | 3.89-7.66 | <0.0001 | 3.097       | 22.14 | 13.80-35.52 | <0.0001 | 3.207       | 24.70 | 15.31-39.84 | <0.0001 |
| eGFR<30 ml/min per 1.73m <sup>2</sup>                | 0.757       | 2.13 | 1.56-2.91 | <0.0001 | 1.875       | 6.52  | 4.18-10.18  | <0.0001 | 2.224       | 9.24  | 5.63-15.16  | <0.0001 |
| Gender, male                                         | 0.810       | 2.25 | 2.00-2.52 | <0.0001 | 1.199       | 3.32  | 2.85-3.85   | <0.0001 | 1.214       | 3.37  | 2.90-3.91   | <0.0001 |
| Age <45 years                                        |             | ref  |           |         |             | ref   |             |         |             | ref   |             |         |
| Age 45-65 years                                      | 0.195       | 1.21 | 1.03-1.43 | 0.0212  | -0.365      | 0.69  | 0.56-0.85   | 0.0005  | -0.364      | 0.69  | 0.57-0.85   | 0.0005  |
| Age >65 years                                        | 0.166       | 1.18 | 1.00-1.39 | 0.0483  | -1.250      | 0.29  | 0.22-0.37   | <0.0001 | -1.252      | 0.29  | 0.22-0.37   | <0.0001 |
| Hypertension, presence of                            | 0.299       | 1.35 | 1.19-1.52 | <0.0001 | 0.626       | 1.87  | 1.60-2.19   | <0.0001 | 0.628       | 1.87  | 1.60-2.19   | <0.0001 |
| Diabetes, presence of                                | -0.033      | 0.97 | 0.81-1.15 | 0.7094  | -0.371      | 0.69  | 0.53-0.89   | 0.0048  | -0.291      | 0.75  | 0.57-0.97   | 0.0313  |
| Body mass index >30 kg/m <sup>2</sup>                | 0.612       | 1.84 | 1.55-2.19 | <0.0001 | 0.591       | 1.81  | 1.47-2.21   | <0.0001 | 0.600       | 1.82  | 1.49-2.23   | <0.0001 |
| Triglycerides >200 mg/dl                             | 0.795       | 2.21 | 1.75-2.81 | <0.0001 | 0.665       | 1.94  | 1.46-2.59   | <0.0001 | 0.684       | 1.98  | 1.49-2.64   | <0.0001 |
| Albuminuria, absence                                 |             | ref  |           |         |             |       |             |         |             | ref   |             |         |
| Microalbuminuria                                     | -0.012      | 0.99 | 0.85-1.15 | 0.8728  |             |       |             |         | -0.177      | 0.84  | 0.67-1.04   | 0.1164  |
| Macrolbuminuria                                      | 0.091       | 1.09 | 0.84-1.43 | 0.5062  |             |       |             |         | -0.701      | 0.50  | 0.50-0.76   | 0.0015  |
| eGFR, each 10 ml/min per 1.73m <sup>2</sup> increase | -0.024      | 0.79 | 0.77-0.81 | <0.0001 |             |       |             |         |             |       |             |         |

Abbreviations: Regr. Coef., logistic regression coefficient; OR, odds ratio; CI, confidence intervals; eGFR, estimated glomerular filtration rate.

**Supplemental Table 8. Correlates of hyperuricemia defined as SUA>7 mg/dl or allopurinol use in patients with available albuminuria (N=7484)**

|                                                      | Univariate  |       |             |         | Model 1     |       |             |         | Model 2     |       |             |         |
|------------------------------------------------------|-------------|-------|-------------|---------|-------------|-------|-------------|---------|-------------|-------|-------------|---------|
|                                                      | Regr. Coef. | OR    | CI 95%      | p       | Regr. Coef. | OR    | CI 95%      | p       | Regr. Coef. | OR    | CI 95%      | p       |
| eGFR ≥90 ml/min per 1.73m <sup>2</sup>               |             | ref   |             |         |             | ref   |             |         |             | ref   |             |         |
| eGFR 89-60 ml/min per 1.73m <sup>2</sup>             | 0.632       | 1.88  | 1.57-2.25   | <0.0001 | 0.833       | 2.30  | 1.83-2.89   | <0.0001 | 0.855       | 2.35  | 1.87-2.96   | <0.0001 |
| eGFR 59-45 ml/min per 1.73m <sup>2</sup>             | 1.441       | 4.22  | 3.40-5.24   | <0.0001 | 1.986       | 7.29  | 5.43-9.78   | <0.0001 | 1.920       | 6.82  | 5.07-9.17   | <0.0001 |
| eGFR 44-30 ml/min per 1.73m <sup>2</sup>             | 2.474       | 11.87 | 9.26-15.22  | <0.0001 | 3.091       | 22.00 | 15.35-31.52 | <0.0001 | 2.856       | 17.40 | 12.01-25.20 | <0.0001 |
| eGFR<30 ml/min per 1.73m <sup>2</sup>                | 2.702       | 14.91 | 11.12-19.98 | <0.0001 | 3.177       | 23.98 | 15.87-36.22 | <0.0001 | 2.691       | 14.75 | 9.38-23.21  | <0.0001 |
| Gender, male                                         | 0.431       | 1.54  | 1.35-1.75   | <0.0001 | 0.714       | 2.04  | 1.71-2.44   | <0.0001 | 0.626       | 1.87  | 1.56-2.23   | <0.0001 |
| Age <45 years                                        |             | ref   |             |         |             | ref   |             |         |             | Ref   |             |         |
| Age 45-65 years                                      | 0.347       | 1.41  | 1.14-1.76   | 0.0017  | -0.244      | 0.80  | 0.612-1.03  | 0.0869  | -0.244      | 0.78  | 0.61-1.01   | 0.0638  |
| Age >65 years                                        | 0.872       | 2.39  | 1.94-2.95   | <0.0001 | -0.484      | 0.62  | 0.46-0.82   | 0.0010  | -0.535      | 0.59  | 0.44-0.78   | 0.0003  |
| Hypertension, presence of                            | 0.138       | 1.15  | 0.99-1.33   | <0.0001 | 0.641       | 1.90  | 1.57-2.29   | <0.0001 | 0.654       | 1.92  | 1.59-2.33   | <0.0001 |
| Diabetes, presence of                                | 0.810       | 2.25  | 1.88-2.68   | <0.0001 | 0.398       | 1.49  | 1.16-1.91   | 0.0017  | 0.194       | 1.21  | 0.94-1.57   | 0.1376  |
| Body mass index, kg/m <sup>2</sup>                   | 0.704       | 2.02  | 1.73-2.36   | <0.0001 | 0.538       | 1.71  | 1.42-2.06   | <0.0001 | 0.527       | 1.69  | 1.40-2.04   | <0.0001 |
| Triglycerides, mg/dl                                 | 1.044       | 2.84  | 2.36-3.41   | <0.0001 | 0.830       | 2.29  | 1.84-2.85   | <0.0001 | 0.822       | 2.27  | 1.82-2.83   | <0.0001 |
| Albuminuria, absence                                 |             | ref   |             |         |             |       |             |         |             | Ref   |             |         |
| Microalbuminuria                                     | 1.077       | 2.94  | 2.52-3.42   | <0.0001 |             |       |             |         | 0.734       | 2.08  | 1.67-2.59   | <0.0001 |
| Macrolbuminuria                                      | 1.833       | 6.25  | 4.93-7.93   | <0.0001 |             |       |             |         | 0.768       | 2.16  | 1.48-3.14   | <0.0001 |
| eGFR, each 10 ml/min per 1.73m <sup>2</sup> increase | -0.035      | 0.70  | 0.69-0.72   | <0.0001 |             |       |             |         |             |       |             |         |

Abbreviations: Regr. Coef., logistic regression coefficient; OR, odds ratio; CI, confidence intervals; eGFR, estimated glomerular filtration rate.
